# Supplementary material
Source: publisher site journal article supplement (https://www.spandidos-publications.com/5401/downloadSupplementary)

Figure S1. H&E staining of important organs. The H&E-stained tissue specimens of heart, liver, spleen, lung and kidney from mice showed no toxic effects in treatment group compared with the control group.

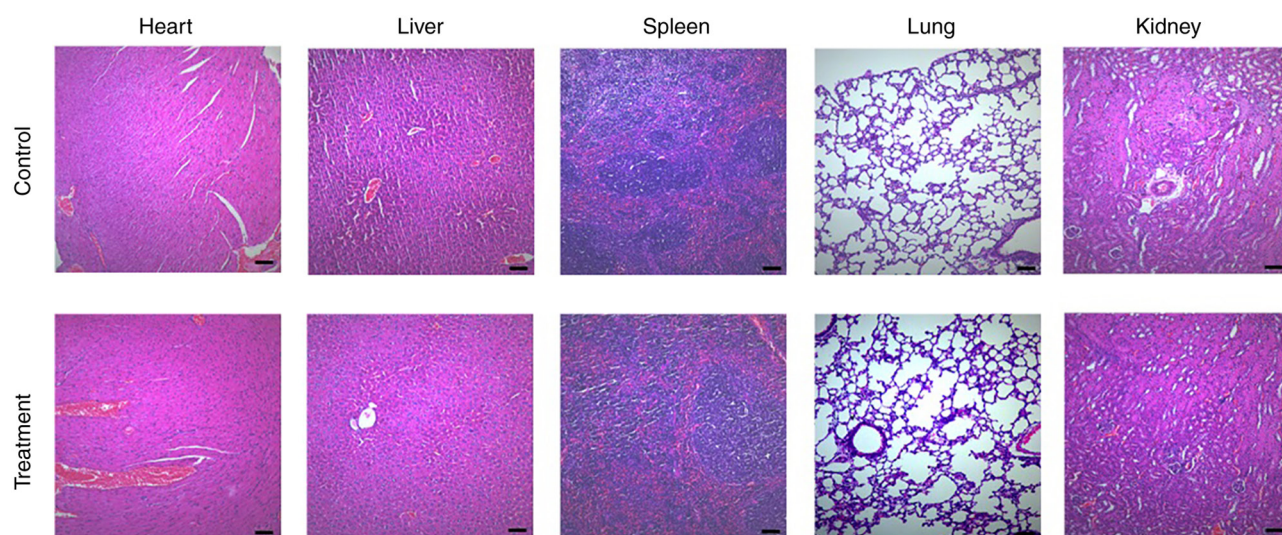

Figure S2. Immunohistochemical staining for NK1R and SP *in vivo*. (A and B) Immunohistochemical staining for total NK1R and SP is shown. Scale bars, 100  $\mu$ m. NK1R, neurokinin-1 receptor; SP, substance P; n.s., not significant.

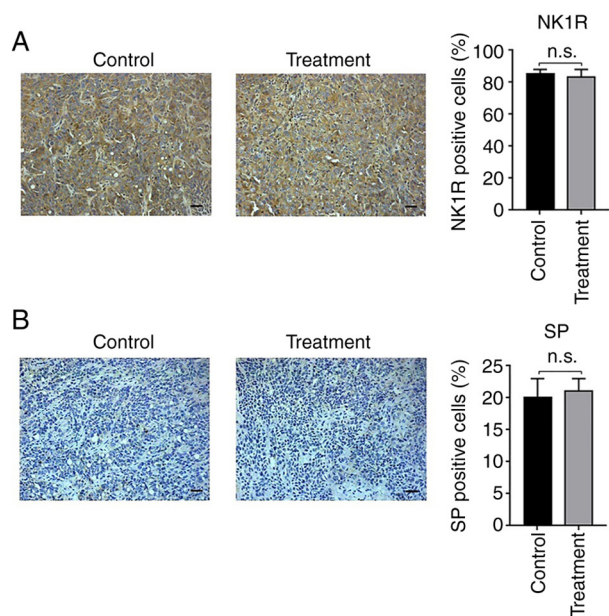

Supplement: Supplementary file 1 [file downloadSupplementary]
